# Supplementary material
Source: publisher site journal article supplement (https://www.dovepress.com/article/604687)
Supplement: Supplementary file 1 [file 604687%20Supplementary%20Material.docx]

Supplementary Table 1: Number of eyes with BCVA recorded at each injection visit and proportion losing ≥5 letters

| **Injection** | **Early Group** | | | **Late Group** | | |
| --- | --- | --- | --- | --- | --- | --- |
| **N at risk** | **Number with ≥5‑letter loss** | **Percentage (%)** | **N at risk** | **Number with ≥5‑letter loss** | **Percentage (%)** |
| 4th | 53 | 9 | 17 | 44 | 8 | 18.2 |
| 5th | 53 | 3 | 5.7 | 44 | 16 | 36.4 |
| 6th | 50 | 11 | 22.0 | 42 | 4 | 9.5 |
| 7th | 47 | 7 | 14.9 | 40 | 25 | 62.5 |
| 8th | 37 | 5 | 13.5 | 34 | 9 | 26.5 |
| 9th | 30 | 4 | 13.3 | 28 | 6 | 21.4 |
| 10th | 25 | 2 | 8 | 24 | 7 | 29.2 |
